# Supplementary material for: Lipid-laden cells differentially distributed in the aging brain are functionally active and correspond to distinct phenotypes
Source: PubMed Central journal article supplement (PMC4814830; doi:10.1038/srep23795), 2016-03-31
Supplement: srep23795-s1.pdf [file srep23795-s1.pdf]

**Lipid-laden cells differentially distributed in the aging brain are functionally active and correspond to distinct phenotypes.**

Marilia Kimie Shimabukuro; Larissa Gutman Paranhos Langhi; Ingrid Cordeiro; José M. Brito; Claudia Maria de Castro Batista; Mark P. Mattson; Valeria de Mello Coelho.

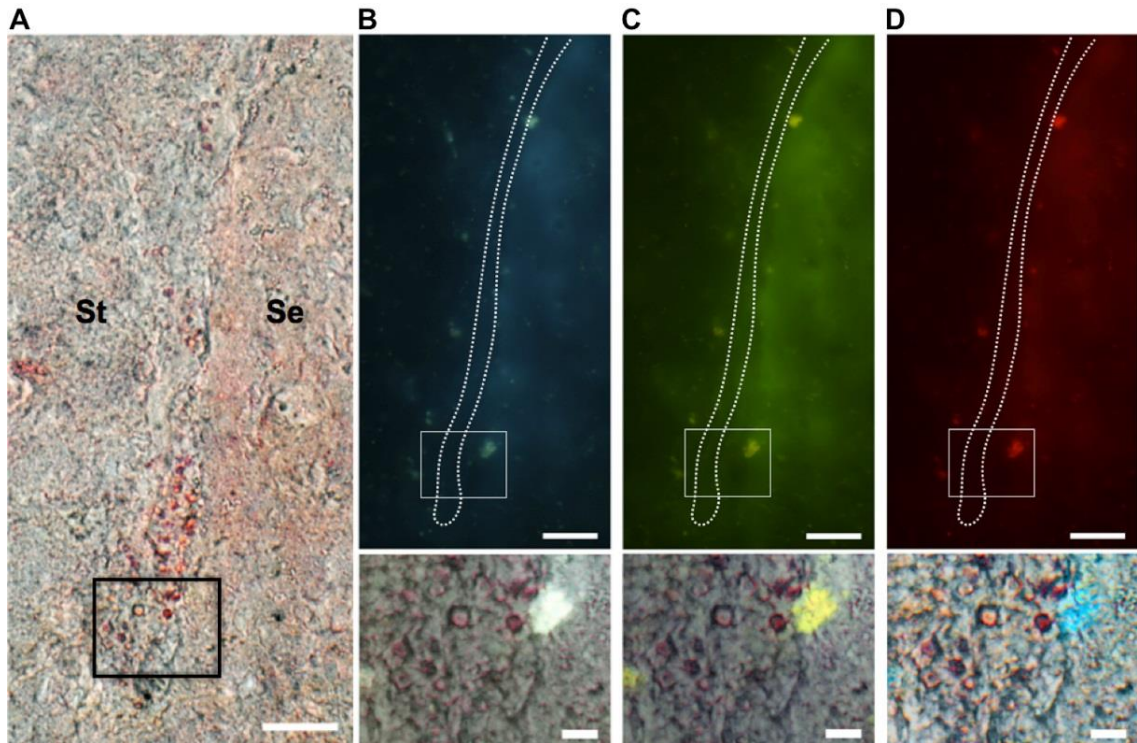

**Supplementary Fig. S1. Oil Red-O<sup>+</sup> lipid droplets did not co-localize with autofluorescent signals in brain tissue.** **A.** Representative photomicrograph showing the ventral portion of the lateral ventricle after Oil Red-O staining. **B-D.** Fluorescence photomicrographs of the same area in (A) showing autofluorescence signals in three different spectra detected before the Oil Red-O staining procedure. In A-D, the black and white defined areas correspond to the same region in the lower panels in (B-D), where Oil Red-O staining is merged with autofluorescence (lipofuscin). In B-D the dotted white lines delineate the lateral ventricle of aged mice. Scale bars: 20  $\mu\text{m}$  (A-D); 5  $\mu\text{m}$  (B, C, D insets).

**Lipid-laden cells differentially distributed in the aging brain are functionally active and correspond to distinct phenotypes.**

Marilia Kimie Shimabukuro; Larissa Gutman Paranhos Langhi; Ingrid Cordeiro; José M. Brito; Claudia Maria de Castro Batista; Mark P. Mattson; Valeria de Mello Coelho.

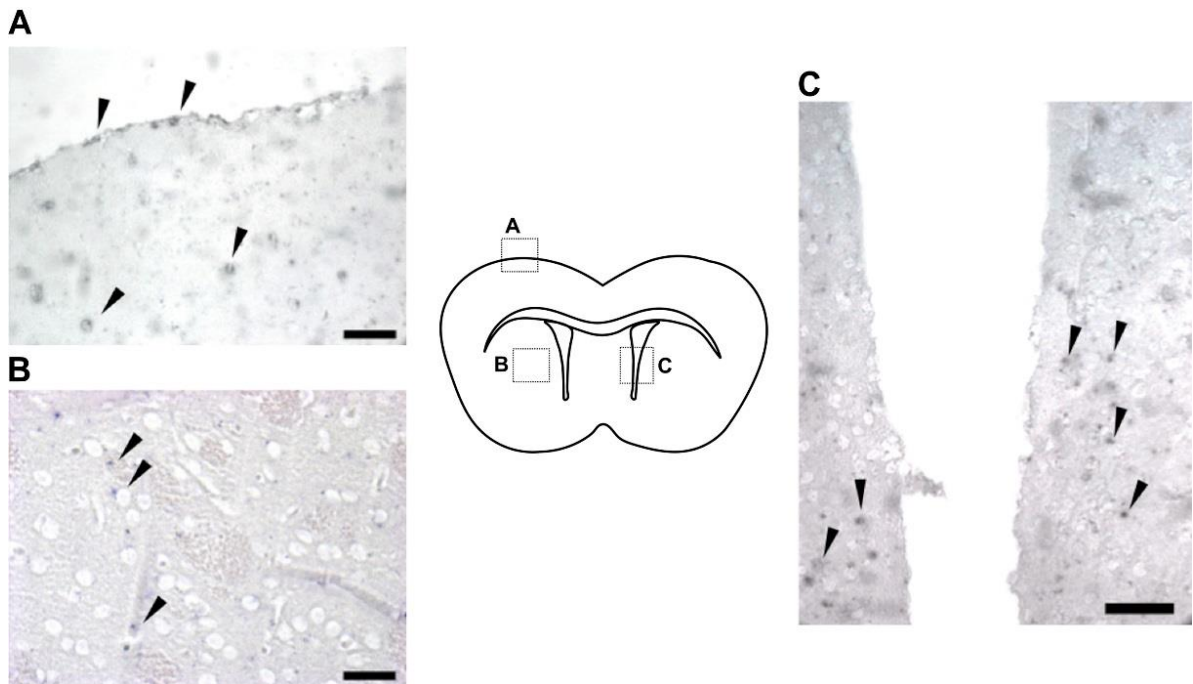

**Supplementary Fig. S2. TNF- $\alpha$  mRNA expression in the old mouse brain. A-C.**

Representative bright field photomicrographs of TNF- $\alpha$  mRNA analyzed by *in situ* hybridization. Positive signals corresponding to TNF- $\alpha$  transcripts are shown in brain cortex and pia mater (A), striatum (B) and lateral ventricle walls (C). Arrowheads indicate some positive signals for TNF- $\alpha$  mRNA. Scale bars: 50  $\mu$ m.
